# Supplementary material for: Sequential deposition route to efficient Sb2S3 solar cells
Source: Royal Society of Chemistry journal article supplement (doi:10.1039/c8ta08296k), 2018-01-01
Supplement: c8ta08296k1.pdf [file c8ta08296k1.pdf]

## Supporting Information

# Sequential Deposition as a Route to Efficient Sb<sub>2</sub>S<sub>3</sub> Solar Cells

*Lijian Zhang,<sup>1</sup> Chunyan Wu,<sup>1</sup> Weifeng Liu,<sup>1</sup> Shangfeng Yang,<sup>1</sup> Mingtai Wang,<sup>2</sup> Tao*

*Chen<sup>\*1</sup> and Changfei Zhu<sup>\*1</sup>*

<sup>1</sup>CAS Key Laboratory of Materials for Energy Conversion, Department of Materials

Science and Engineering, University of Science and Technology of China, No. 96

Jinzhai Road, Hefei, Anhui 230026, P. R. China.

<sup>2</sup>Institute of Applied Technology, Hefei Institutes of Physical Science, Chinese

Academy of Sciences, Hefei, Anhui 230031, P. R. China.

\*Corresponding Authors: tchenmse@ustc.edu.cn (T. C.), cfzhu@ustc.edu.cn (C. F. Z.).

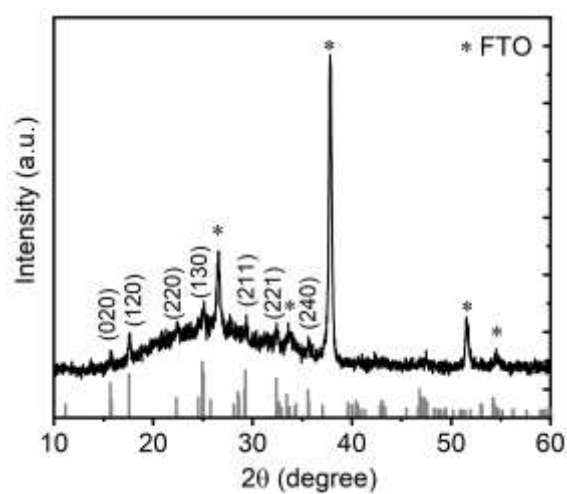

Figure S1. The detailed index of XRD pattern of Sb<sub>2</sub>S<sub>3</sub> thin films prepared from 6 M TU deposited on Sb(Ac)<sub>3</sub> film annealed at 320 °C for 2 min.

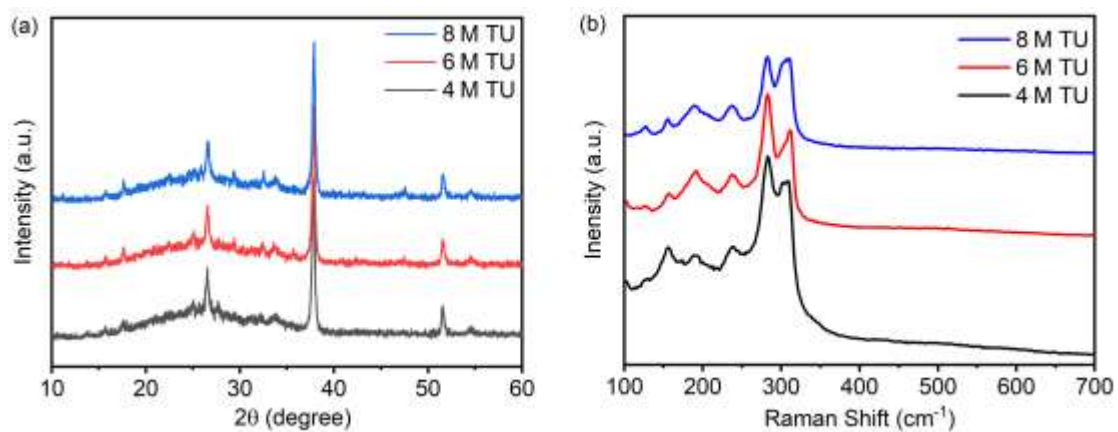

Figure S2. (a) The XRD spectra and (b) the Raman spectra of  $\text{Sb}_2\text{S}_3$  thin films prepared from 4 M, 6 M and 8 M TU deposited on  $\text{Sb}(\text{Ac})_3$  film annealed at 320 °C for 2 min, respectively.

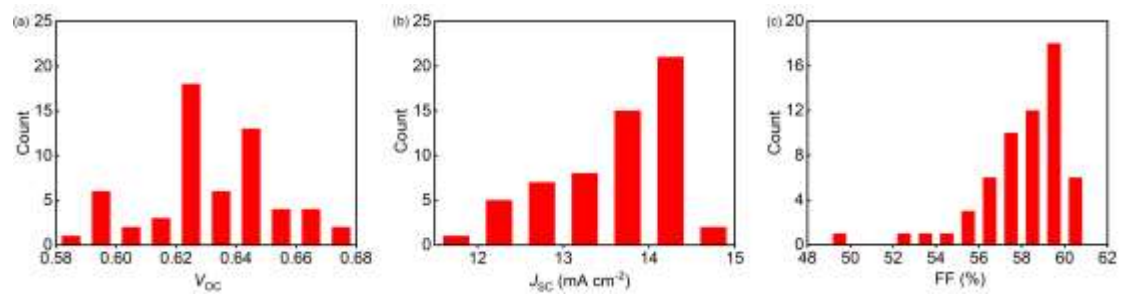

Figure S3. The histogram of device (a)  $V_{OC}$  (b)  $J_{SC}$ , and (c) FF obtained from 59 individually fabricated solar cells with  $\text{Sb}_2\text{S}_3$  thin films prepared from 6 M TU annealing at 320 °C for 2 min.

Table S1. Photovoltaic parameters of the devices with different thicknesses of Sb<sub>2</sub>S<sub>3</sub>

| Thickness<br>(nm) | PCE<br>(%) | $V_{oc}$<br>(V) | $J_{sc}$<br>(mA.cm <sup>-2</sup> ) | FF<br>(%) |
|-------------------|------------|-----------------|------------------------------------|-----------|
| 62                | 5.69       | 0.66            | 14.34                              | 60.43     |
| 82                | 4.42       | 0.64            | 12.02                              | 57.81     |
| 96                | 3.34       | 0.61            | 10.36                              | 53.10     |
| 120               | 2.25       | 0.61            | 8.93                               | 41.05     |

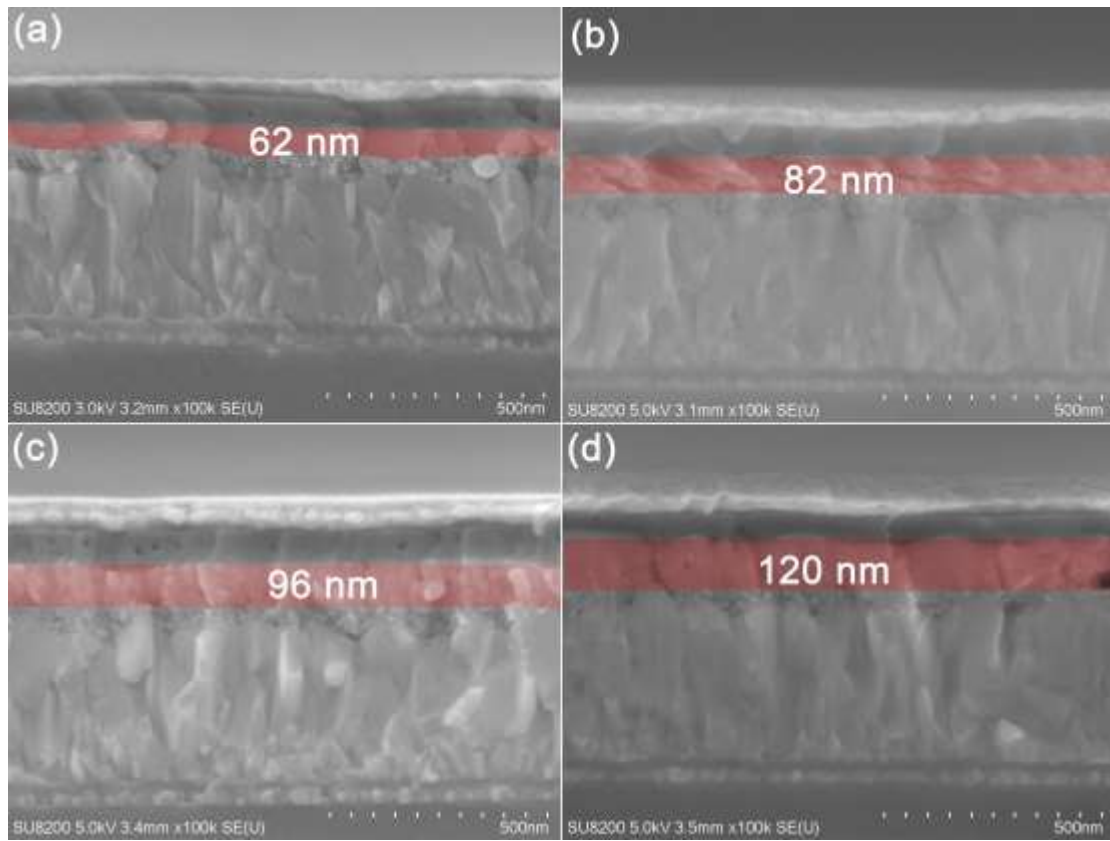

Figure S4. The different thicknesses of  $\text{Sb}_2\text{S}_3$  films for devices according to SEM: (a) 62 nm, (b) 82 nm, (c) 96 nm and (d) 120 nm.

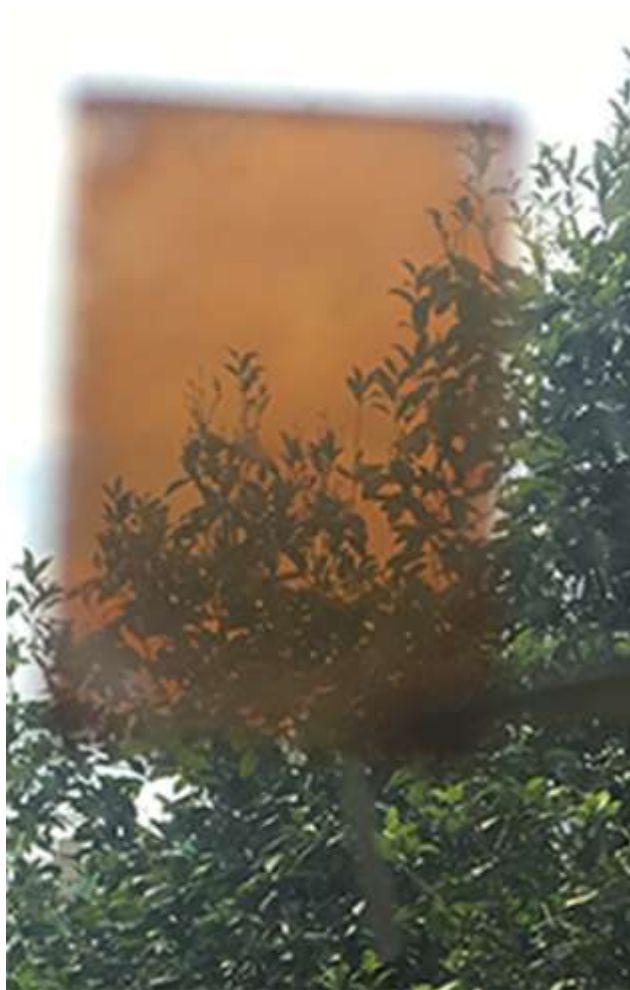

Figure S5. The digital image of Sb<sub>2</sub>S<sub>3</sub> thin film prepared from 6 M TU annealing at 320 °C for 2 min.
